# Supplementary material for: High strength and low hysteresis hydrogel based sensing control IoT system for both visible self-monitoring and remote monitoring of massage pressure
Source: Research Square preprint supplement (doi:10.21203/rs.3.rs-3390334/v1), 2023-10-06
Supplement: Supplementary file 1 [file 8dfe1cc14753e8c6a4669cbb.docx]

# Supplementary Information

**High strength and low hysteresis hydrogel based sensing control IoT system for both visible self-monitoring and remote monitoring of massage pressure**

*Min Chen*1*, Chengwei Wu*1*, Wei Zhang*1***

1State Key Laboratory of Structural Analysis, Optimization and CAE Software for Industrial Equipment, Department of Engineering Mechanics, Dalian University of Technology (DUT), Dalian 116024, China

* Correspondence should be addressed to Prof. Zhang (E-mail: wei.zhang@dlut.edu.cn).


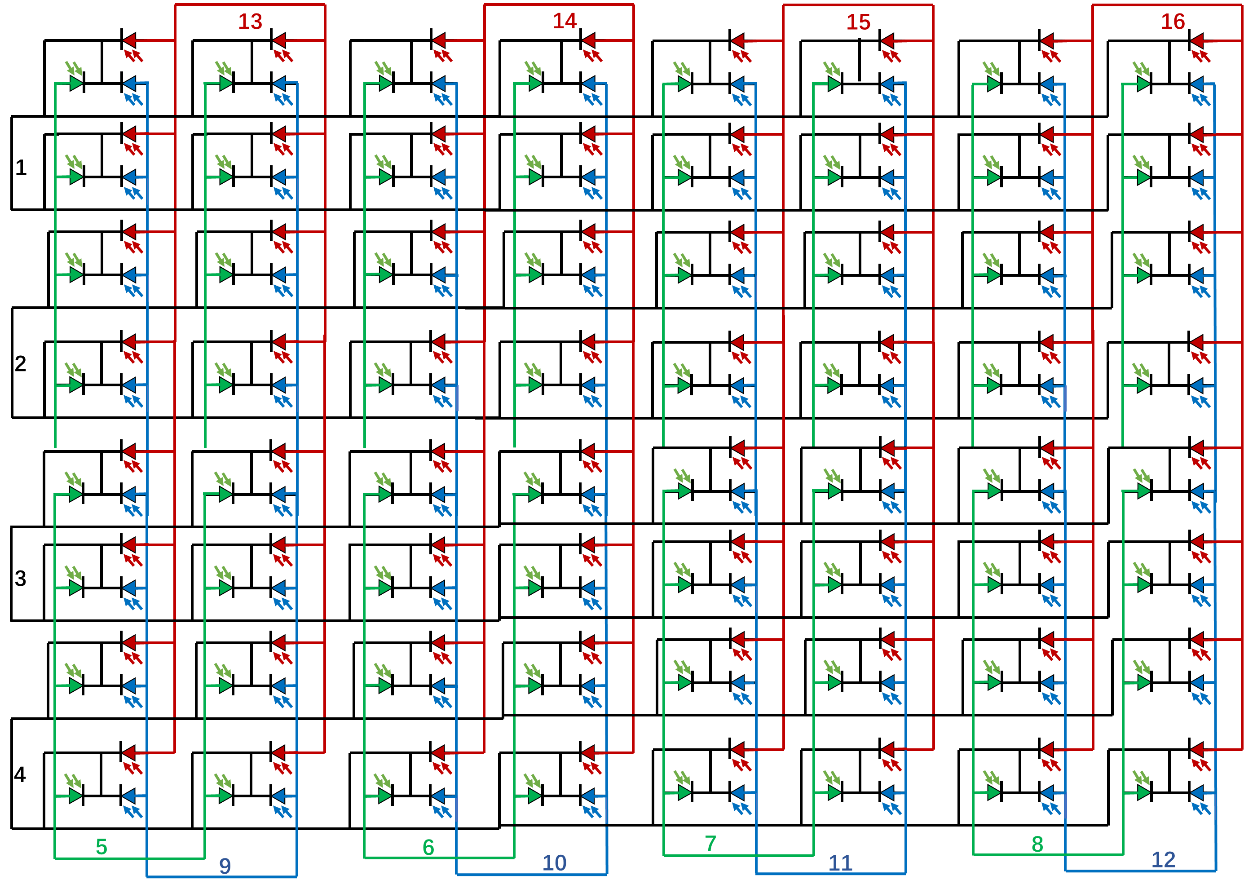


**Fig. S1.** Overall schematic of connection of LEDs arrays


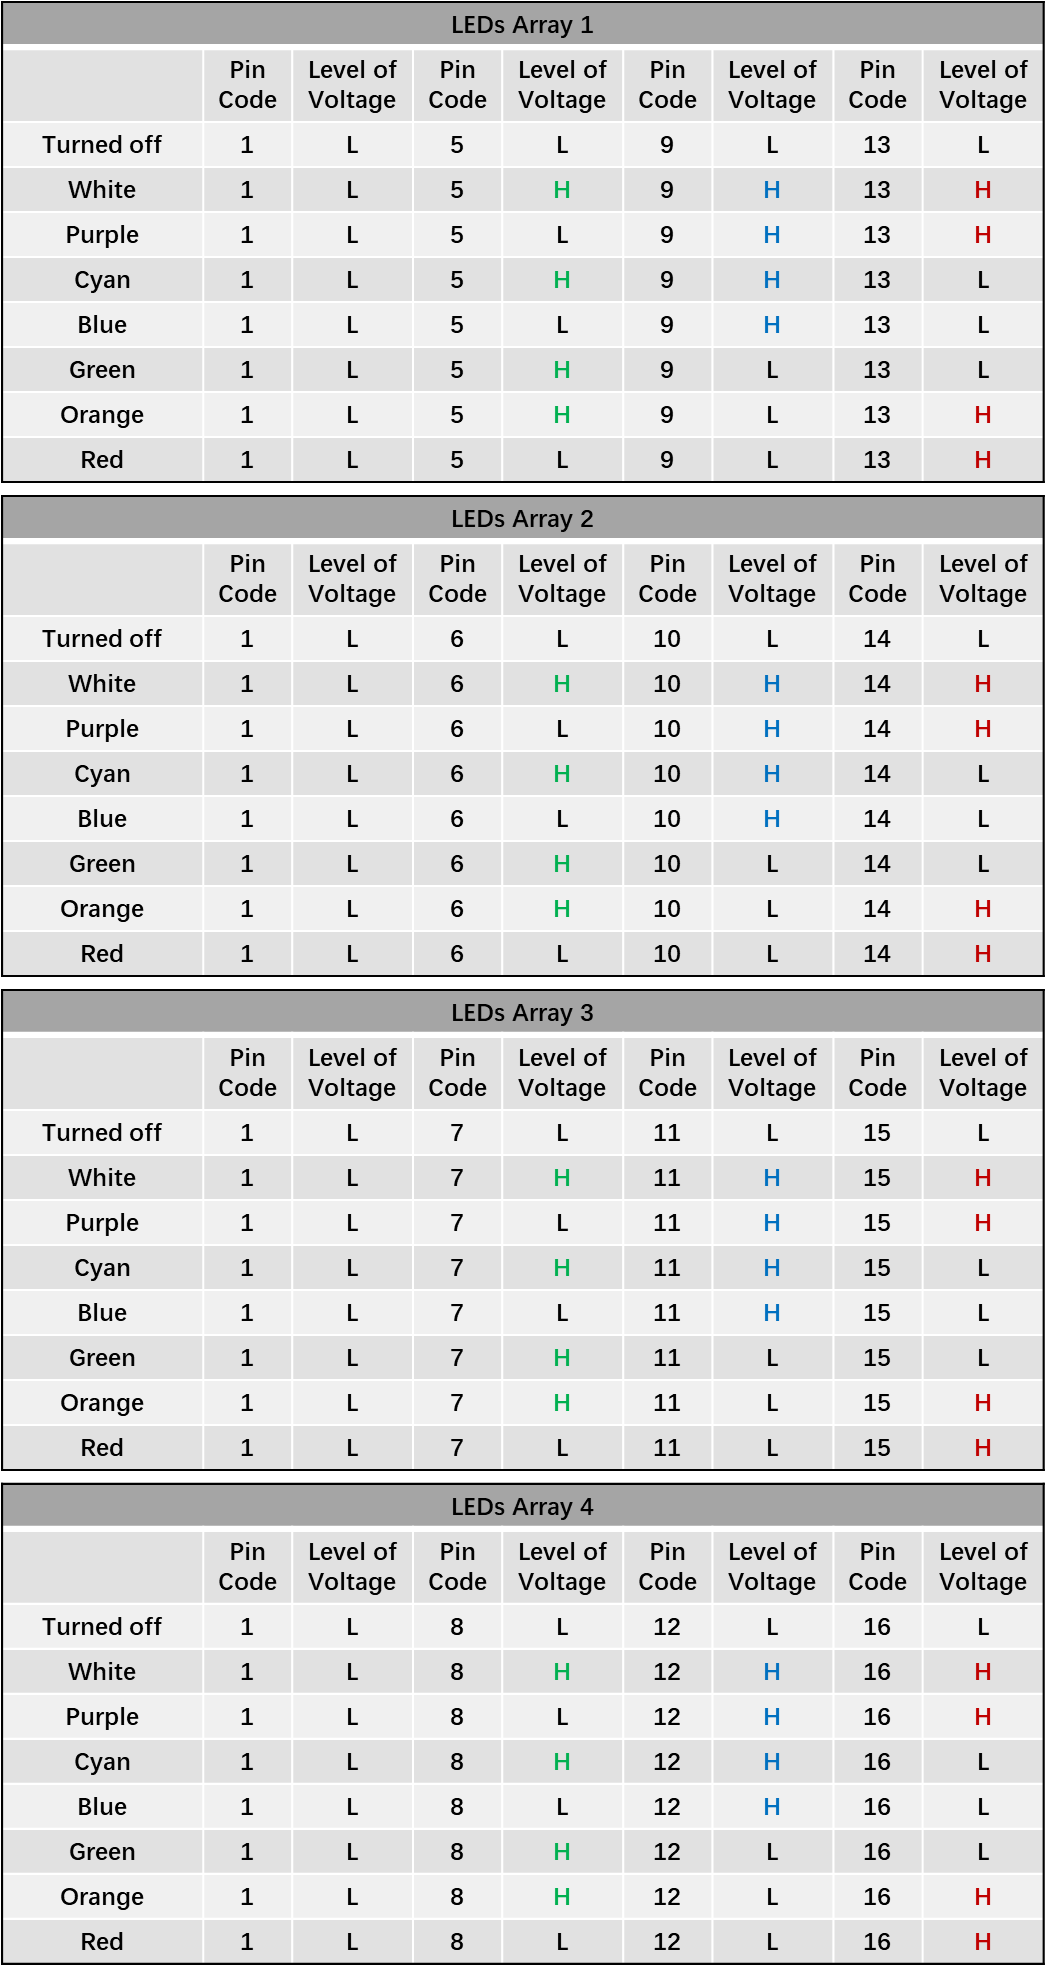

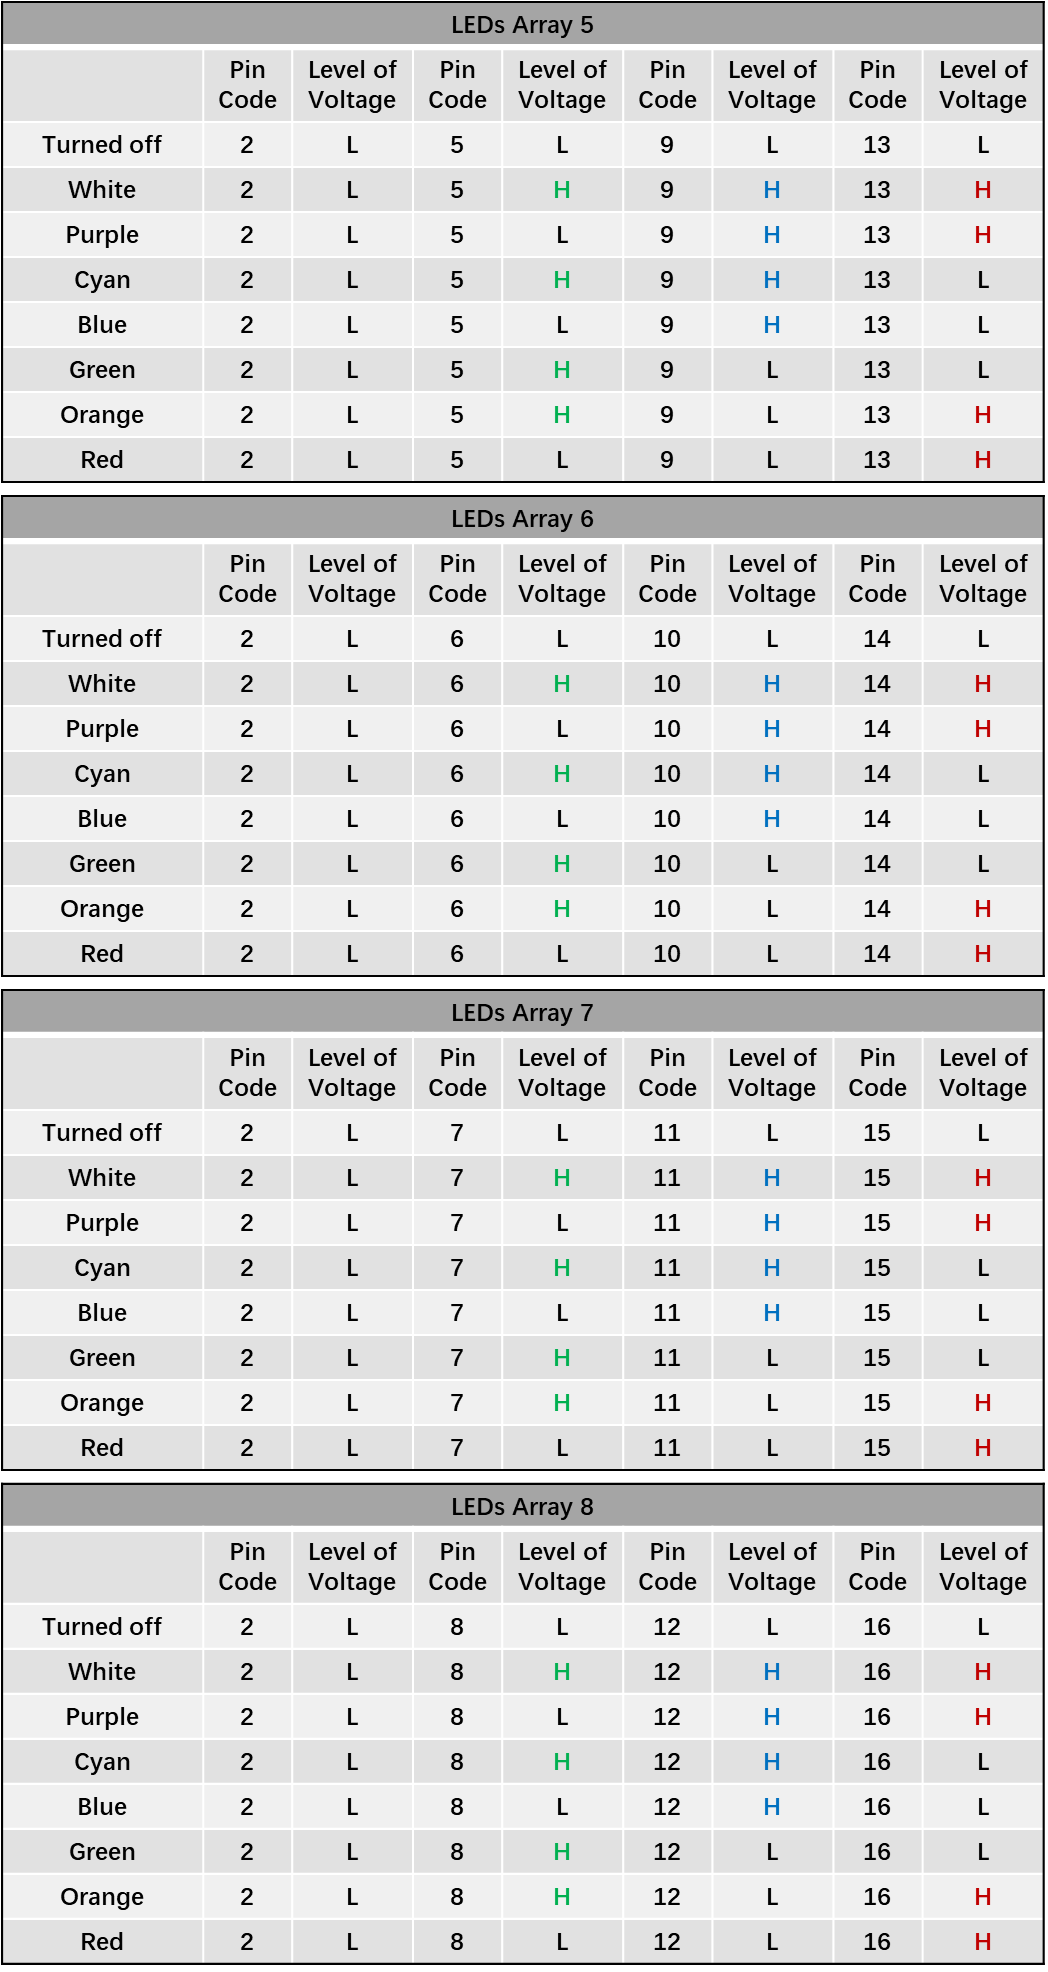

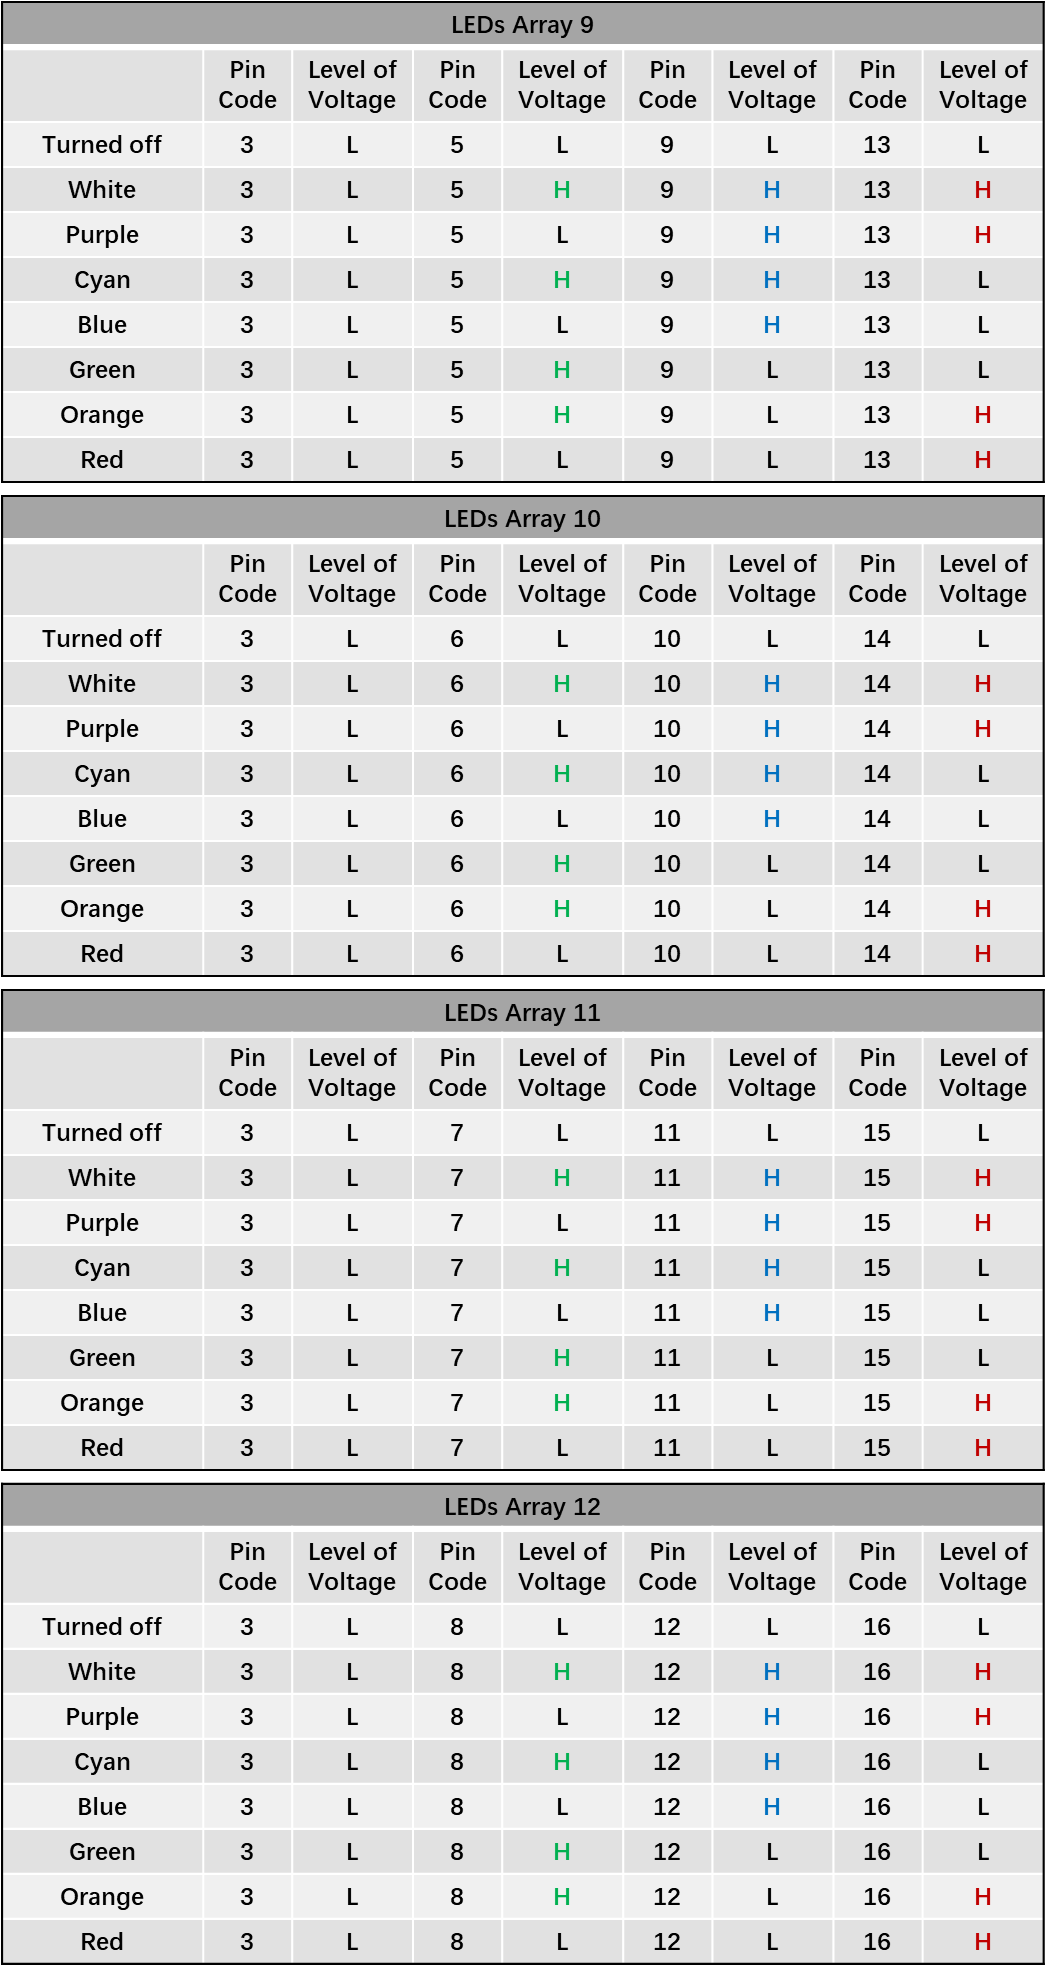

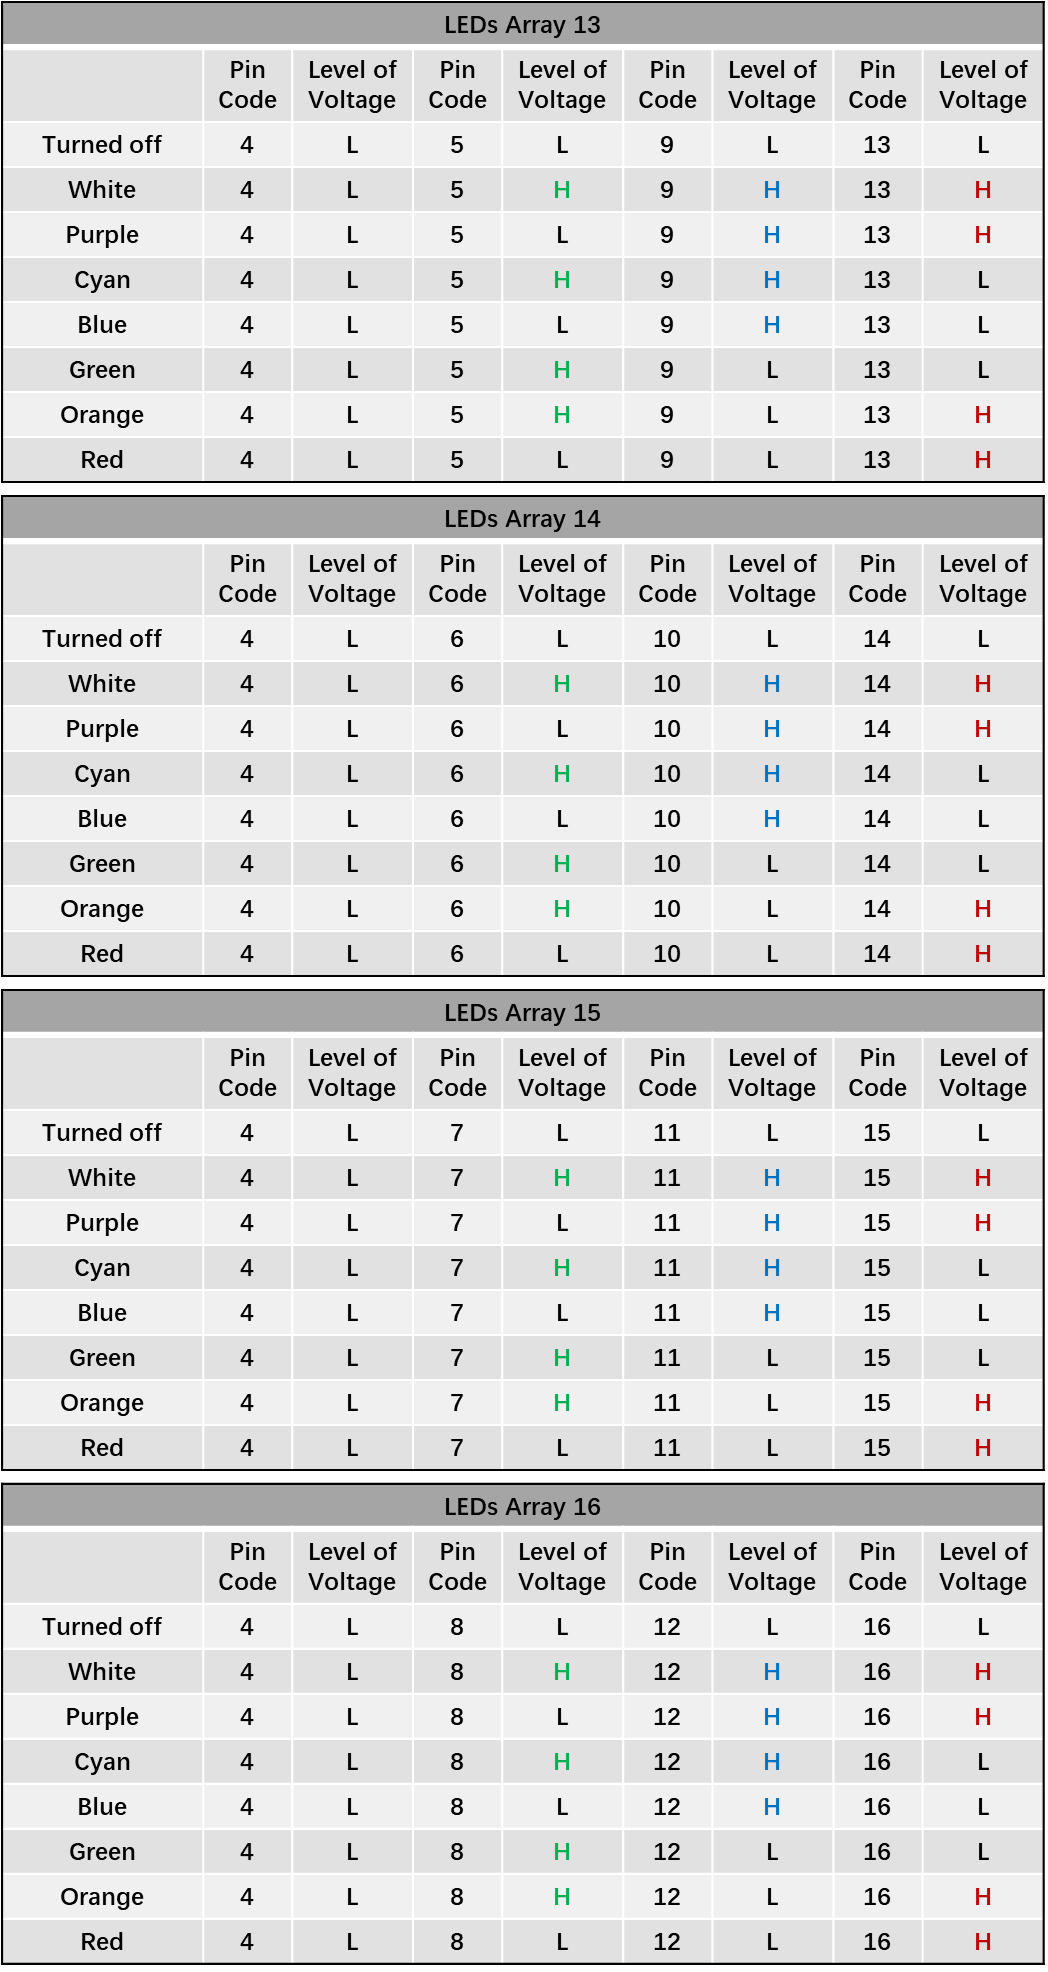


**Fig. S2.** Level of voltage of digital output pins to control different color states of the LEDs arrays.


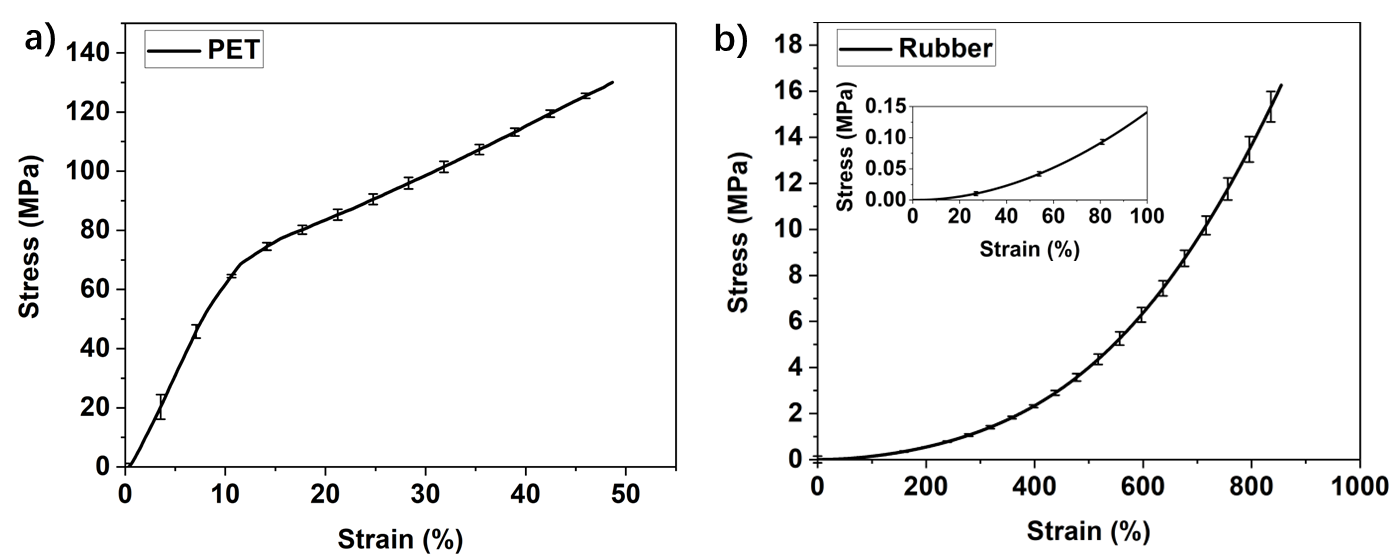


**Fig. S3.** a) the stress-strain curve of PET. b) the stress-strain curve of the rubber, the inset: the stress-strain curve between strain of 0 and 100% of the rubber.
